# Supplementary material
Source: publisher figshare collection journal article supplement (https://acs.figshare.com/ndownloader/files/3893638)
Supplement: Supplementary file 1 [file 3893638]

 
data_p21n 
 
_audit_creation_method            SHELXL-97 
_chemical_name_systematic 
; 
 ? 
; 
_chemical_name_common             ? 
_chemical_melting_point           ? 
_chemical_formula_moiety          
 'C15 H19 N O3 Si'  
_chemical_formula_sum 
 'C15 H19 N O3 Si' 
_chemical_formula_weight          289.40 
 
loop_ 
 _atom_type_symbol 
 _atom_type_description 
 _atom_type_scat_dispersion_real 
 _atom_type_scat_dispersion_imag 
 _atom_type_scat_source 
 'C'  'C'   0.0181   0.0091 
 'International Tables Vol C Tables 4.2.6.8 and 6.1.1.4' 
 'H'  'H'   0.0000   0.0000 
 'International Tables Vol C Tables 4.2.6.8 and 6.1.1.4' 
 'N'  'N'   0.0311   0.0180 
 'International Tables Vol C Tables 4.2.6.8 and 6.1.1.4' 
 'O'  'O'   0.0492   0.0322 
 'International Tables Vol C Tables 4.2.6.8 and 6.1.1.4' 
 'Si'  'Si'   0.2541   0.3302 
 'International Tables Vol C Tables 4.2.6.8 and 6.1.1.4' 
 
_symmetry_cell_setting            monoclinic 
_symmetry_space_group_name_H-M    P2(1)/n  
 
loop_ 
 _symmetry_equiv_pos_as_xyz 
 'x, y, z' 
 '-x+1/2, y+1/2, -z+1/2' 
 '-x, -y, -z' 
 'x-1/2, -y-1/2, z-1/2' 
 
_cell_length_a                    11.6235(4) 
_cell_length_b                    10.0558(3) 
_cell_length_c                    12.9667(4) 
_cell_angle_alpha                 90.00 
_cell_angle_beta                  97.843(2) 
_cell_angle_gamma                 90.00 
_cell_volume                      1501.42(8) 
_cell_formula_units_Z             4 
_cell_measurement_temperature     90(2) 
_cell_measurement_reflns_used     8560
_cell_measurement_theta_min       4.80
_cell_measurement_theta_max       66.21
 
_exptl_crystal_description        BLOCK 
_exptl_crystal_colour             COLOURLESS
_exptl_crystal_size_max           0.05 
_exptl_crystal_size_mid           0.03 
_exptl_crystal_size_min           0.03 
_exptl_crystal_density_meas       ? 
_exptl_crystal_density_diffrn     1.280 
_exptl_crystal_density_method     'not measured' 
_exptl_crystal_F_000              616 
_exptl_absorpt_coefficient_mu     1.443 
_exptl_absorpt_correction_type    multi-scan 
_exptl_absorpt_correction_T_min   0.9314 
_exptl_absorpt_correction_T_max   0.9580 
_exptl_absorpt_process_details    'SADABS SHELXL-97 (Sheldrick, 2008)' 
 
_exptl_special_details 
; 
 ? 
; 
 
_diffrn_ambient_temperature       90(2) 
_diffrn_radiation_wavelength      1.54178 
_diffrn_radiation_type            CuK\a 
_diffrn_radiation_source          'fine-focus sealed tube' 
_diffrn_radiation_monochromator   graphite 
_diffrn_measurement_device_type   'Bruker APEX-II CCD'
_diffrn_measurement_method        '\f and \w scans'
_diffrn_detector_area_resol_mean  ? 
_diffrn_standards_number          ? 
_diffrn_standards_interval_count  ? 
_diffrn_standards_interval_time   ? 
_diffrn_standards_decay_%         ? 
_diffrn_reflns_number             12072 
_diffrn_reflns_av_R_equivalents   0.0238 
_diffrn_reflns_av_sigmaI/netI     0.0183 
_diffrn_reflns_limit_h_min        -13 
_diffrn_reflns_limit_h_max        13 
_diffrn_reflns_limit_k_min        -6 
_diffrn_reflns_limit_k_max        11 
_diffrn_reflns_limit_l_min        -15 
_diffrn_reflns_limit_l_max        15 
_diffrn_reflns_theta_min          4.79 
_diffrn_reflns_theta_max          65.06 
_reflns_number_total              2551 
_reflns_number_gt                 2402 
_reflns_threshold_expression      >2sigma(I) 
 
_computing_data_collection        'Bruker APEX2 (Bruker, 2011)' 
_computing_cell_refinement        'Bruker SAINT (Bruker, 2011)' 
_computing_data_reduction         'Bruker SAINT (Bruker, 2011)' 
_computing_structure_solution     'SHELXS-97 (Sheldrick, 2008)' 
_computing_structure_refinement   'SHELXL-97 (Sheldrick, 2008)' 
_computing_molecular_graphics     'SHELXP-97 (Sheldrick, 2008)'  
_computing_publication_material   'Bruker SHELXTL(Bruker,2011)'   

 
_refine_special_details 
; 
 Refinement of F^2^ against ALL reflections.  The weighted R-factor wR and 
 goodness of fit S are based on F^2^, conventional R-factors R are based 
 on F, with F set to zero for negative F^2^. The threshold expression of 
 F^2^ > 2sigma(F^2^) is used only for calculating R-factors(gt) etc. and is 
 not relevant to the choice of reflections for refinement.  R-factors based 
 on F^2^ are statistically about twice as large as those based on F, and R- 
 factors based on ALL data will be even larger. 
; 
 
_refine_ls_structure_factor_coef  Fsqd  
_refine_ls_matrix_type            full 
_refine_ls_weighting_scheme       calc  
_refine_ls_weighting_details 
 'calc w=1/[\s^2^(Fo^2^)+(0.0458P)^2^+0.7908P] where P=(Fo^2^+2Fc^2^)/3' 
_atom_sites_solution_primary      direct 
_atom_sites_solution_secondary    difmap 
_atom_sites_solution_hydrogens    geom 
_refine_ls_hydrogen_treatment     constr 
_refine_ls_extinction_method      none 
_refine_ls_extinction_coef        ? 
_refine_ls_number_reflns          2551 
_refine_ls_number_parameters      213 
_refine_ls_number_restraints      129 
_refine_ls_R_factor_all           0.0395 
_refine_ls_R_factor_gt            0.0374 
_refine_ls_wR_factor_ref          0.0997 
_refine_ls_wR_factor_gt           0.0980 
_refine_ls_goodness_of_fit_ref    1.142 
_refine_ls_restrained_S_all       1.129 
_refine_ls_shift/su_max           0.000 
_refine_ls_shift/su_mean          0.000 
 
loop_ 
 _atom_site_label 
 _atom_site_type_symbol 
 _atom_site_fract_x 
 _atom_site_fract_y 
 _atom_site_fract_z 
 _atom_site_U_iso_or_equiv 
 _atom_site_adp_type 
 _atom_site_occupancy 
 _atom_site_symmetry_multiplicity 
 _atom_site_calc_flag 
 _atom_site_refinement_flags 
 _atom_site_disorder_assembly 
 _atom_site_disorder_group 
Si1 Si 0.49030(4) 0.20264(5) 0.76826(3) 0.02415(16) Uani 1 1 d DU . . 
C1 C 0.56491(14) 0.23637(16) 0.90417(13) 0.0244(4) Uani 1 1 d DU A . 
C2 C 0.69357(15) 0.2363(2) 0.89372(15) 0.0363(5) Uani 1 1 d DU . . 
H2A H 0.7279 0.1487 0.9148 0.044 Uiso 0.836(5) 1 calc PR A 1 
H2B H 0.7342 0.3050 0.9398 0.044 Uiso 0.836(5) 1 calc PR A 1 
H2C H 0.7224 0.1459 0.8812 0.044 Uiso 0.164(5) 1 calc PR A 2 
H2D H 0.7410 0.2758 0.9554 0.044 Uiso 0.164(5) 1 calc PR A 2 
O1 O 0.6107(2) 0.2107(3) 0.71335(18) 0.0312(7) Uani 0.836(5) 1 d PDU A 1 
C3 C 0.7087(2) 0.2655(3) 0.7793(2) 0.0344(7) Uani 0.836(5) 1 d PDU A 1 
H3 H 0.7814 0.2219 0.7630 0.041 Uiso 0.836(5) 1 calc PR A 1 
C4 C 0.7165(2) 0.4140(3) 0.76130(19) 0.0443(8) Uani 0.836(5) 1 d PDU A 1 
H4A H 0.7172 0.4312 0.6870 0.066 Uiso 0.836(5) 1 calc PR A 1 
H4B H 0.7881 0.4486 0.8009 0.066 Uiso 0.836(5) 1 calc PR A 1 
H4C H 0.6494 0.4583 0.7844 0.066 Uiso 0.836(5) 1 calc PR A 1 
O1A O 0.6043(10) 0.2586(13) 0.7159(8) 0.030(3) Uani 0.164(5) 1 d PDU A 2 
C3A C 0.6898(9) 0.3313(15) 0.7908(8) 0.031(3) Uani 0.164(5) 1 d PDU A 2 
H3A H 0.6651 0.4244 0.8036 0.037 Uiso 0.164(5) 1 calc PR A 2 
C4A C 0.8053(9) 0.3246(14) 0.7541(9) 0.041(4) Uani 0.164(5) 1 d PDU A 2 
H4A1 H 0.8285 0.2314 0.7492 0.062 Uiso 0.164(5) 1 calc PR A 2 
H4A2 H 0.8627 0.3714 0.8035 0.062 Uiso 0.164(5) 1 calc PR A 2 
H4A3 H 0.8008 0.3666 0.6855 0.062 Uiso 0.164(5) 1 calc PR A 2 
C5 C 0.38123(17) 0.33004(19) 0.71946(15) 0.0361(4) Uani 1 1 d . A . 
H5A H 0.4147 0.4188 0.7328 0.054 Uiso 1 1 calc R . . 
H5B H 0.3127 0.3206 0.7553 0.054 Uiso 1 1 calc R . . 
H5C H 0.3586 0.3181 0.6444 0.054 Uiso 1 1 calc R . . 
C6 C 0.43170(19) 0.03388(19) 0.74012(15) 0.0374(4) Uani 1 1 d . A . 
H6A H 0.4314 0.0140 0.6661 0.056 Uiso 1 1 calc R . . 
H6B H 0.3522 0.0292 0.7572 0.056 Uiso 1 1 calc R . . 
H6C H 0.4804 -0.0311 0.7821 0.056 Uiso 1 1 calc R . . 
C7 C 0.51922(14) 0.26253(16) 0.99189(13) 0.0230(4) Uani 1 1 d . . . 
C8 C 0.39054(14) 0.25622(16) 0.99041(12) 0.0213(3) Uani 1 1 d . A . 
C9 C 0.32748(14) 0.37051(16) 1.00655(12) 0.0238(4) Uani 1 1 d . . . 
H9 H 0.3673 0.4522 1.0214 0.029 Uiso 1 1 calc R A . 
C10 C 0.20787(14) 0.36691(16) 1.00132(12) 0.0239(4) Uani 1 1 d . A . 
H10 H 0.1652 0.4450 1.0123 0.029 Uiso 1 1 calc R . . 
C11 C 0.15207(14) 0.24709(17) 0.97973(12) 0.0223(4) Uani 1 1 d . . . 
C12 C 0.21103(14) 0.13050(16) 0.96524(12) 0.0237(4) Uani 1 1 d . A . 
H12 H 0.1706 0.0489 0.9516 0.028 Uiso 1 1 calc R . . 
C13 C 0.33093(14) 0.13624(16) 0.97118(12) 0.0232(4) Uani 1 1 d . . . 
H13 H 0.3732 0.0573 0.9620 0.028 Uiso 1 1 calc R A . 
C14 C 0.58941(15) 0.29762(17) 1.09134(14) 0.0287(4) Uani 1 1 d . A . 
H14 H 0.6701 0.3113 1.0903 0.034 Uiso 1 1 calc R . . 
C15 C 0.55096(18) 0.31195(18) 1.18183(14) 0.0347(4) Uani 1 1 d . . . 
H15A H 0.4709 0.2993 1.1868 0.042 Uiso 1 1 calc R A . 
H15B H 0.6033 0.3349 1.2420 0.042 Uiso 1 1 calc R . . 
N1 N 0.02470(12) 0.24245(15) 0.97276(11) 0.0278(3) Uani 1 1 d . A . 
O2 O -0.02635(10) 0.34475(13) 0.99041(11) 0.0362(3) Uani 1 1 d . . . 
O3 O -0.02423(11) 0.13692(14) 0.94879(13) 0.0442(4) Uani 1 1 d . . . 
 
loop_ 
 _atom_site_aniso_label 
 _atom_site_aniso_U_11 
 _atom_site_aniso_U_22 
 _atom_site_aniso_U_33 
 _atom_site_aniso_U_23 
 _atom_site_aniso_U_13 
 _atom_site_aniso_U_12 
Si1 0.0216(3) 0.0256(3) 0.0250(3) 0.00013(17) 0.00239(18) -0.00282(18) 
C1 0.0185(8) 0.0237(8) 0.0299(9) 0.0037(7) -0.0003(6) -0.0014(6) 
C2 0.0202(9) 0.0514(12) 0.0369(10) 0.0035(9) 0.0025(7) -0.0027(8) 
O1 0.0291(10) 0.0336(18) 0.0324(10) -0.0059(9) 0.0096(7) -0.0074(10) 
C3 0.0242(12) 0.0442(18) 0.0365(14) -0.0103(13) 0.0099(10) -0.0078(12) 
C4 0.0552(17) 0.0489(17) 0.0305(12) -0.0065(11) 0.0118(11) -0.0272(13) 
O1A 0.031(5) 0.021(7) 0.035(5) 0.010(4) 0.001(4) -0.014(5) 
C3A 0.023(6) 0.040(9) 0.028(6) -0.003(6) 0.001(4) -0.012(6) 
C4A 0.035(6) 0.055(8) 0.036(6) 0.003(5) 0.010(5) -0.011(6) 
C5 0.0406(11) 0.0300(10) 0.0340(10) 0.0005(8) -0.0088(8) 0.0012(8) 
C6 0.0503(12) 0.0281(10) 0.0353(10) -0.0047(8) 0.0107(9) -0.0043(8) 
C7 0.0227(8) 0.0177(8) 0.0275(8) 0.0037(6) -0.0013(7) -0.0010(6) 
C8 0.0229(8) 0.0221(8) 0.0184(8) 0.0018(6) 0.0009(6) 0.0002(6) 
C9 0.0265(8) 0.0199(8) 0.0244(8) 0.0006(6) 0.0009(6) -0.0022(6) 
C10 0.0272(9) 0.0214(8) 0.0228(8) 0.0004(6) 0.0024(6) 0.0039(6) 
C11 0.0192(8) 0.0274(9) 0.0198(8) 0.0016(6) 0.0013(6) 0.0006(6) 
C12 0.0255(8) 0.0215(8) 0.0233(8) -0.0008(6) 0.0004(6) -0.0032(7) 
C13 0.0241(8) 0.0210(8) 0.0240(8) 0.0002(6) 0.0014(6) 0.0022(6) 
C14 0.0260(9) 0.0258(9) 0.0317(9) 0.0051(7) -0.0054(7) -0.0017(7) 
C15 0.0411(11) 0.0308(10) 0.0286(9) -0.0004(7) -0.0077(8) 0.0005(8) 
N1 0.0213(7) 0.0312(9) 0.0304(8) 0.0021(6) 0.0013(6) 0.0005(6) 
O2 0.0243(6) 0.0360(7) 0.0481(8) -0.0036(6) 0.0040(6) 0.0076(5) 
O3 0.0239(7) 0.0348(8) 0.0729(10) -0.0050(7) 0.0029(6) -0.0062(6) 
 
_geom_special_details 
; 
 All esds (except the esd in the dihedral angle between two l.s. planes) 
 are estimated using the full covariance matrix.  The cell esds are taken 
 into account individually in the estimation of esds in distances, angles 
 and torsion angles; correlations between esds in cell parameters are only 
 used when they are defined by crystal symmetry.  An approximate (isotropic) 
 treatment of cell esds is used for estimating esds involving l.s. planes. 
; 
 
loop_ 
 _geom_bond_atom_site_label_1 
 _geom_bond_atom_site_label_2 
 _geom_bond_distance 
 _geom_bond_site_symmetry_2 
 _geom_bond_publ_flag 
Si1 O1 1.657(2) . ? 
Si1 O1A 1.668(11) . ? 
Si1 C6 1.8464(19) . ? 
Si1 C5 1.8521(19) . ? 
Si1 C1 1.8857(17) . ? 
C1 C7 1.345(2) . ? 
C1 C2 1.520(2) . ? 
C2 C3 1.546(3) . ? 
C2 C3A 1.636(11) . ? 
C2 H2A 0.9900 . ? 
C2 H2B 0.9900 . ? 
C2 H2C 0.9900 . ? 
C2 H2D 0.9900 . ? 
O1 C3 1.438(3) . ? 
C3 C4 1.516(4) . ? 
C3 H3 1.0000 . ? 
C4 H4A 0.9800 . ? 
C4 H4B 0.9800 . ? 
C4 H4C 0.9800 . ? 
O1A C3A 1.484(13) . ? 
C3A C4A 1.485(13) . ? 
C3A H3A 1.0000 . ? 
C4A H4A1 0.9800 . ? 
C4A H4A2 0.9800 . ? 
C4A H4A3 0.9800 . ? 
C5 H5A 0.9800 . ? 
C5 H5B 0.9800 . ? 
C5 H5C 0.9800 . ? 
C6 H6A 0.9800 . ? 
C6 H6B 0.9800 . ? 
C6 H6C 0.9800 . ? 
C7 C14 1.472(2) . ? 
C7 C8 1.494(2) . ? 
C8 C9 1.394(2) . ? 
C8 C13 1.397(2) . ? 
C9 C10 1.383(2) . ? 
C9 H9 0.9500 . ? 
C10 C11 1.379(2) . ? 
C10 H10 0.9500 . ? 
C11 C12 1.384(2) . ? 
C11 N1 1.472(2) . ? 
C12 C13 1.386(2) . ? 
C12 H12 0.9500 . ? 
C13 H13 0.9500 . ? 
C14 C15 1.319(3) . ? 
C14 H14 0.9500 . ? 
C15 H15A 0.9500 . ? 
C15 H15B 0.9500 . ? 
N1 O3 1.224(2) . ? 
N1 O2 1.2246(19) . ? 
 
loop_ 
 _geom_angle_atom_site_label_1 
 _geom_angle_atom_site_label_2 
 _geom_angle_atom_site_label_3 
 _geom_angle 
 _geom_angle_site_symmetry_1 
 _geom_angle_site_symmetry_3 
 _geom_angle_publ_flag 
O1 Si1 O1A 16.9(5) . . ? 
O1 Si1 C6 105.71(12) . . ? 
O1A Si1 C6 121.5(5) . . ? 
O1 Si1 C5 113.47(12) . . ? 
O1A Si1 C5 99.9(5) . . ? 
C6 Si1 C5 110.57(9) . . ? 
O1 Si1 C1 94.88(10) . . ? 
O1A Si1 C1 91.7(3) . . ? 
C6 Si1 C1 117.40(8) . . ? 
C5 Si1 C1 113.64(8) . . ? 
C7 C1 C2 125.61(16) . . ? 
C7 C1 Si1 129.87(13) . . ? 
C2 C1 Si1 104.43(12) . . ? 
C1 C2 C3 109.14(16) . . ? 
C1 C2 C3A 99.0(4) . . ? 
C3 C2 C3A 25.9(5) . . ? 
C1 C2 H2A 109.9 . . ? 
C3 C2 H2A 109.9 . . ? 
C3A C2 H2A 135.2 . . ? 
C1 C2 H2B 109.9 . . ? 
C3 C2 H2B 109.9 . . ? 
C3A C2 H2B 92.4 . . ? 
H2A C2 H2B 108.3 . . ? 
C1 C2 H2C 112.0 . . ? 
C3 C2 H2C 86.1 . . ? 
C3A C2 H2C 112.0 . . ? 
H2A C2 H2C 25.2 . . ? 
H2B C2 H2C 126.5 . . ? 
C1 C2 H2D 112.0 . . ? 
C3 C2 H2D 125.1 . . ? 
C3A C2 H2D 112.0 . . ? 
H2A C2 H2D 88.6 . . ? 
H2B C2 H2D 20.9 . . ? 
H2C C2 H2D 109.7 . . ? 
C3 O1 Si1 114.25(18) . . ? 
O1 C3 C4 110.2(2) . . ? 
O1 C3 C2 108.24(19) . . ? 
C4 C3 C2 110.6(2) . . ? 
O1 C3 H3 109.3 . . ? 
C4 C3 H3 109.3 . . ? 
C2 C3 H3 109.3 . . ? 
C3A O1A Si1 113.4(7) . . ? 
O1A C3A C4A 108.8(10) . . ? 
O1A C3A C2 100.8(7) . . ? 
C4A C3A C2 108.1(9) . . ? 
O1A C3A H3A 112.8 . . ? 
C4A C3A H3A 112.8 . . ? 
C2 C3A H3A 112.8 . . ? 
C3A C4A H4A1 109.5 . . ? 
C3A C4A H4A2 109.5 . . ? 
H4A1 C4A H4A2 109.5 . . ? 
C3A C4A H4A3 109.5 . . ? 
H4A1 C4A H4A3 109.5 . . ? 
H4A2 C4A H4A3 109.5 . . ? 
Si1 C5 H5A 109.5 . . ? 
Si1 C5 H5B 109.5 . . ? 
H5A C5 H5B 109.5 . . ? 
Si1 C5 H5C 109.5 . . ? 
H5A C5 H5C 109.5 . . ? 
H5B C5 H5C 109.5 . . ? 
Si1 C6 H6A 109.5 . . ? 
Si1 C6 H6B 109.5 . . ? 
H6A C6 H6B 109.5 . . ? 
Si1 C6 H6C 109.5 . . ? 
H6A C6 H6C 109.5 . . ? 
H6B C6 H6C 109.5 . . ? 
C1 C7 C14 123.51(16) . . ? 
C1 C7 C8 119.39(15) . . ? 
C14 C7 C8 117.10(15) . . ? 
C9 C8 C13 118.73(15) . . ? 
C9 C8 C7 120.58(15) . . ? 
C13 C8 C7 120.68(14) . . ? 
C10 C9 C8 121.10(15) . . ? 
C10 C9 H9 119.4 . . ? 
C8 C9 H9 119.4 . . ? 
C11 C10 C9 118.34(15) . . ? 
C11 C10 H10 120.8 . . ? 
C9 C10 H10 120.8 . . ? 
C10 C11 C12 122.68(15) . . ? 
C10 C11 N1 118.79(15) . . ? 
C12 C11 N1 118.52(15) . . ? 
C11 C12 C13 118.03(15) . . ? 
C11 C12 H12 121.0 . . ? 
C13 C12 H12 121.0 . . ? 
C12 C13 C8 121.08(15) . . ? 
C12 C13 H13 119.5 . . ? 
C8 C13 H13 119.5 . . ? 
C15 C14 C7 126.22(17) . . ? 
C15 C14 H14 116.9 . . ? 
C7 C14 H14 116.9 . . ? 
C14 C15 H15A 120.0 . . ? 
C14 C15 H15B 120.0 . . ? 
H15A C15 H15B 120.0 . . ? 
O3 N1 O2 123.75(14) . . ? 
O3 N1 C11 118.15(14) . . ? 
O2 N1 C11 118.09(14) . . ? 
 
_diffrn_measured_fraction_theta_max    0.999 
_diffrn_reflns_theta_full              65.06 
_diffrn_measured_fraction_theta_full   0.999 
_refine_diff_density_max    0.296 
_refine_diff_density_min   -0.286 
_refine_diff_density_rms    0.043 
